## Male bumblebees perform learning flights on leaving a flower but not when leaving their nest

Théo Robert<sup>1</sup>, Elisa Frasnelli<sup>1</sup>, Thomas S. Collett<sup>2</sup>, Natalie Hempel de Ibarra<sup>1\*</sup>

<sup>1</sup> Centre for Research in Animal Behaviour, Psychology, University of Exeter, Exeter, EX4 4QG, UK

<sup>2</sup> School of Life Sciences, University of Sussex, Brighton, BN1 9QG, UK

\* Correspondence to: [n.hempel@exeter.ac.uk](mailto:n.hempel@exeter.ac.uk)

### Keywords

Insect, bee, learning, flight, navigation, flower

### Summary statement

Bumblebee males leave their nest directly, but they perform learning flights when they leave artificial flowers, during which they turn back and fixate the flowers.

### Abstract

Female bees and wasps demonstrate, through their performance of elaborate learning flights, when they memorise features of a significant site. An important feature of these flights is that the insects look back to fixate the site that they are leaving. Females, which forage for nectar and pollen and return with it to the nest, execute learning flights on their initial departures from both their nest and newly discovered flowers. To our knowledge, these flights have so far only been studied in females. Here we describe and analyse putative learning flights observed in male bumblebees, *Bombus terrestris* L. Once male bumblebees are mature, they leave their nest for good and fend for themselves. We show that, unlike female foragers, males always flew directly away from their nest, without looking back, in keeping with their indifference to their natal nest. In contrast, after males had drunk from artificial flowers, their flights on first leaving the flowers resembled the learning flights of females, particularly in their fixations of the flowers. These differences in the occurrence of female and male learning flights seem to match the diverse needs of the two sexes to learn about ecologically relevant aspects of their environment.

## Introduction

In many animal species the two sexes, to some degree, know and learn about different things. In eusocial insects, like bees, the roles of females and males are quite distinct. In the bumblebee, *Bombus terrestris* L., the species with which we are concerned here, a single female queen lays fertilised eggs. Other females are workers that perform one of several tasks for the benefit of the colony. They may, for instance, tend larvae, guard the colony, explore for nest or food sites, forage for nectar and pollen which they bring back to the nest. The workers forage individually and must learn the locations of both their nest and of good foraging sites. Male *Bombus terrestris*, in contrast, are not concerned about the state of the colony. They leave their nest to find potential mates and do not return (Goulson, 2010; Paxton, 2005). Indeed, possibly as part of a strategy to avoid inbreeding (Baer, 2003; Gerloff and Schmid-Hempel, 2005; Whitehorn et al., 2009), they may travel as far as 10 km where they live as solitary foragers and patrol the terrain for queens (Coppée et al., 2011; Kraus et al., 2009; Paxton, 2005). Whereas males may well learn the location of foraging sites near to their patrolling area, they have no reason to learn to return to their nest. Are these differences in life style - foraging for the community by females and foraging for themselves by males - reflected in the occurrence of learning flights in the two sexes?

Female wasps and bees on first leaving their nest or a flower perform elaborate flights (Brünnert et al., 1994; Collett, 1995; Collett et al., 2013; Collett and Lehrer, 1993; Hempel de Ibarra et al., 2009; Lehrer, 1993; Opfinger, 1931; Philippides et al., 2013; Stürzl et al., 2016; Tinbergen, 1932; Vollbehr, 1975; Zeil, 1993a; Zeil, 1993b) lasting sometimes tens of seconds during which they learn the location of that site. These learning flights consist of stereotyped manoeuvres (Collett et al., 2013; Philippides et al., 2013; Stürzl et al., 2016), which seemed to be designed to pick up visual information that can guide their return to the site. The durations of flights when leaving a flower are probably related to the reward that the flower gives (Wei et al., 2002; Wei and Dyer, 2009). But flights from the nest seem to be triggered by some appreciation of the nest's significance combined with the insect's lack of knowledge of the nest's location. So far, learning flights have not been studied in male insects. Some observations suggest that honeybee drones initially tend to perform short flights at the hive prior to mating flights which could well be learning flights (Howell and Usinger, 1933; Witherell, 1971). We find here, confirming earlier observations (Hempel de Ibarra et al., 2009), that male bumblebees with no attachment to their natal nest, even though they have

fed there, depart directly from the nest without looking back. We now investigate whether the flights of males leaving flowers resemble those of female workers.

## Materials and Methods

### *Experimental procedures*

Experiments were conducted from June 2015 to March 2016 in a greenhouse (8 by 12m floor area) at the Streatham campus of the University of Exeter. Male and female worker bumblebees, *Bombus terrestris audax*, from commercially reared colonies (Koppert UK), were marked individually with coloured number tags. *Bombus terrestris* is a ground-nesting species that leaves its nest through a hole in the ground. To mimic this situation, we placed each experimental colony under a table and recorded the flights of naïve, male and worker bees when they left their nest through a hole in the centre of a table. We also recorded the bees' departures after they had fed from a flat artificial flower on top of another table (Fig. 1).

The tables (1.5x1.8m) were covered with white gravel that was frequently raked. Three black cylinders (17x5cm) were placed around the nest entrance at a distance of 24.5 cm (centre of the landmark). The nest entrance was surrounded by a purple plastic ring (5 cm outer diameter), which was frequently cleaned. A second identically arranged table with a sucrose dispenser (50% w/w) in the centre of another purple ring, was placed 5m away. We refer to the sucrose dispenser and purple ring as an artificial flower. The behaviour of bees leaving the nest and the flower was recorded at 50 frames per second with video cameras (Panasonic HC-V720, HD 1080p) that were hung 1.35m above each table. An area of appx. 70x90cm was captured in an image of 1920x1080 pixels.

Male bumblebees (identified by the presence of claspers) typically emerge in mature colonies and after some days leave the nest. When a male bumblebee flew out of the nest, we let it fly around the greenhouse before catching it in a butterfly net. Because males were not motivated to feed for many hours after leaving the nest, they were kept overnight in a box and then placed individually on the flower the next day. We recorded the male on video while it was on the flower and its subsequent departure from it. The data for workers came from a separate experiment. Worker bees were initially accustomed to artificial flowers by placing them individually on a similar flower on a third, training table. On their second flight from the nest,

the training table was hidden and workers found the experimental flower on the second table by themselves.

### *Bees and colonies*

We analysed data from 30 males from 6 colonies. The males after leaving the hive were kept overnight in cages indoors and flew normally when leaving the flower or returning to it. The flights of 14 female foragers were recorded on their flights to and from the nest and flower. We analysed a bee's first departure from the nest and flower, respectively. Sometimes, departures from the flower were slightly aberrant with the bee landing during these flights ( $n=5$  workers,  $n=5$  males). We then analysed the second departure instead of the first.

### *Data analysis*

The positions and body orientations of the bees (Fig. 2) were extracted from the video-recordings using custom-written codes in Matlab (Philippides et al., 2013). Angles are measured with counter-clockwise direction positive and clockwise negative. We measure the duration of flights from the nest or the flower as the time it took the bees to cross a 30cm radius circle centred on the nest entrance or the flower. Similarly, we measure cumulative distance as the distance a bee travels before it crosses for the first time a circle of a given radius.

Both workers and males on their departure from the flower can be seen to look back and face it. We adopted the following procedure in order to analyse these flower fixations. We first extracted all fixations relative to the flower. To do so, we took the angular position of the bee's longitudinal axis relative to the flower ( $\varphi$ ) (Fig. 3) and scanned successive frames of each flight, noting the modular angular difference ( $\text{diff } \varphi$ ) between adjacent frames,  $n$  and  $n+1$ . If  $\text{diff } \varphi$  was  $>3^\circ$ , we repeated this calculation on the next pair of frames i.e. frames  $n+1$  and  $n+2$ , continuing the process until  $\text{diff } \varphi$  was  $\leq 3^\circ$ . Such a small rotational difference indicated the potential start of what we accept as a fixation. To test whether it was indeed a start, we added the next frame to the two-frame sample. If the modular difference between the minimum and maximum values of the sample of three frames ( $\varphi$  [diff.min.max]) was  $\leq 3^\circ$ , we added the next frame to the sample and again tested whether  $\varphi$  [diff.min.max] of the four-frame sample was  $\leq 3^\circ$ . This loop was repeated, sequentially adding frames until  $\varphi$  [diff.min.max] of the whole sample was  $>3^\circ$ . Provided that the sample size of successive

frames with  $\varphi$  [diff.min.max]  $\leq 3^\circ$  was  $\geq 4$  frames, the sample was included as a fixation and we recorded its duration and the median value of  $\varphi$ . We then continued to scan neighbouring frames until we encountered the start of another potential fixation ( $\varphi$  [diff])  $\leq 3^\circ$ , when once more we tested whether these and subsequent frames met our criteria of a fixation. If they did not, the scanning of neighbouring frames was resumed from the 2nd frame after the potential start. This process continued until the end of the flight and was applied to all male and worker learning flights at the flower.

To test whether the selected fixations were more precisely oriented towards the flower than would be expected from the overall distribution of  $\varphi$  across learning flights, we carried out two randomisation tests that were computed in R (version 3.2.0). In the first test, we combined all the frames of the measured fixation intervals into one sample. For each frame of this sample we took the absolute value of the difference between  $\varphi$  and  $\varphi=0^\circ$  and averaged these values. This total (Mean[abs.diff]) (see Fig. 3) was then compared with the Mean[abs.diff]s of samples of the same number of frames which were selected randomly from all the flights. We generated 100,000 random samples and found that none of the Mean[abs.diff]s of the 100,000 were smaller than the Mean[abs.diff] of the real fixation sample (Fig. 3). We therefore rejected the hypothesis that the flower-facing fixations can be obtained by randomly selecting frames from all the flights.

In the second test, we took each fixation separately and calculated the absolute value of the difference between the median  $\varphi$  of the fixation and  $\varphi=0^\circ$ . These absolute values were averaged across all the fixations (Mean[median.abs.diff]) and compared with that of random selections of consecutive frames. Thus, we randomly selected groups of consecutive frames from different flights to match the number of fixations and their durations (Fig. 3) and calculated the Mean[median.abs.diff] of this random sample of groups. As in the first test, we repeated the randomisation procedure 100,000 times. Again, none of the Mean[median.abs.diff]s of the 100,000 were smaller than the Mean[median.abs.diff] of the real fixation sample (Fig. 3).

## Results

### *Departures from nest and flower*

Males on their departure from the nest accelerated directly away without turning back to face the nest (Fig. 2A). The males' flights when leaving the flower were significantly longer and more complex (Fig. 2B, D). The first departures from the flower were recorded when males were placed on the flower, rather than when they found it by themselves. To check whether this procedure might have disturbed the bees' flights on their departure, we tested workers with the same procedure. The workers' learning flights were of similar duration (see *Data analysis*) whether they were placed on the flower (N=14, Mean=4.83s±1.25) or flew there by themselves (N=14, Mean=5.33±1.02, Mann-Whitney-U test, U=78.5, Z=-0.90, p=0.37). This similarity suggests that the departure flights of males are also unlikely to be influenced by the way in which a bee reaches the flower. Learning flights after a male's return to the flower support this suggestion (Fig. 2C).

Although males were deprived of food for about a day before being placed on the flower, the time that they spent on the flower was variable. Sometimes males flew away very soon and sometimes they stayed there for 2-3 minutes (Fig. 4A). We had no direct measurement of when a bee started to drink and how long it drank when on the flower, but it is reasonable to suppose that drinking time is correlated with time spent on the flower. Since males forage for themselves and not for the colony, their motivational state may well be more variable than that of workers. The time that males spent on the flower is correlated with the duration of their flight on departure (Spearman Rank, rho=0.51, p=0.0042, Fig. 4A), suggesting that a short time spent on the flower, allowing little or no time to drink, is insufficient to trigger learning. For this reason, we have excluded males that were in the bottom quartile of time spent on the flower (from 1.8 to 14.4s) from further analysis.

In several respects the flights of males leaving flowers resembled those of females. Durations of the flights did not differ significantly (Fig 4B and C) in contrast to the very short durations of male flights leaving the nest and the very long flights of female workers leaving the nest. The similarities between the durations of male and female flights at the flower are mirrored in the cumulative distance plots (Fig. 4D) in which both sexes took a longer, more circuitous route when leaving the feeder (Fig. 2, S1, S2), than did males leaving the nest.

### *Flower fixations*

A hallmark of learning flights is that bees or wasps look back towards the nest or flower (Collett and Lehrer, 1993; Hempel de Ibarra et al., 2009; Lehrer, 1993; Riabinina et al., 2014; Stürzl et al., 2016), presumably recording views that can guide their return. Whereas bumblebee males almost never faced the nest on leaving it, they, like workers, always did when they left the flower. The flight excerpt in Figure 2D includes three instances (marked in red) of a male facing the flower on departure. The first is a very brief period of hovering at 1.7s. The second and third are longer, starting at 3.5s and at 4s. During the third, the male flies back towards the flower (see Fig. S1 and S2 for further examples).

This difference between facing flowers but not the nest can be seen in plots of the body orientation of males relative to the nest and flower ( $\varphi$ ) that includes all the frames of all the recorded flights (Fig. 5A). On flights from the flower, the broad peak of the distribution of facing directions relative to the flower ( $\varphi$ ) is in its direction (Fig. 5A, circular mean:  $44.02^\circ$ ,  $r = 0.092$ , Rayleigh Z test,  $Z=41.93$ ,  $P<0.0001$ ), but on leaving the nest, the peak of the distribution of facing directions is in the direction of departure (circular mean:  $177.36^\circ$ ,  $r = 0.726$ , Rayleigh Z test,  $Z=615.38$ ,  $P<0.0001$ ): the bee faced the nest on only 0.35% of frames (Fig. 5A).

To what extent are frames in which bees look at the flower grouped together so that the bees fixate the flower for consecutive frames? To examine flower fixations, we extracted periods in which the bees' looking directions relative to the flower ( $\varphi$ ) remained relatively constant (see *Data analysis*). A partition of all the frames of male departures from the flower into those that do and do not fall within these extracted fixations shows a strong peak towards the flower in the distribution of frames within the fixations (Fig. 5B). No such peak is seen for the distribution of frames outside fixations. In addition, a resampling analysis (Good, 2006) shows that the distribution of frames in the fixations is significantly more peaked in the direction of the flower than would be expected from the overall distribution of frames from all flights (Fig. 5A, see Fig. 3 for details). It thus seems that bees tend to look at the flower during brief periods of fixation (Fig. 5C).

The modal duration of these fixations was 80ms in males and in females, both when the bees fixated the flower within  $\pm 20^\circ$  and when they looked elsewhere (Fig. 6). While in both sexes the distribution of fixations peaked when bees faced the flower (Fig. 5C), workers spent very



slightly more of the flight facing the flower than did males. Thus, males faced the flower in  $11.03\% \pm 1.74\text{SE}$  of all frames and females in  $14.42\% \pm 2.42\text{SE}$  of all frames (Mann-Whitney-U,  $U=125.5$ ,  $Z=1.29$ ,  $p=0.20$ ). In both males and females fixations of the flower occurred most often when bees were close to the flower, within 5-10cm of its centre (Fig. 5D). The flights of males and females leaving the flower are thus quite comparable.

### *Returns to flowers*

On several occasions males were recorded when they flew back to revisit the flower ( $N=8$ , Fig. 2E). These returns resembled those of workers. Like workers returning to the nest (Philippides et al., 2013), the male in Fig. 2E faced the flower at the turning points of its zigzag approach. The flight speeds of males and workers dropped at about the same rate during the bees' approaches to the flower (Fig. 7A). Likewise, the path lengths of the bees' approach to the flower from 30cm were similar in both sexes (Fig. 7B). Males faced the flower less often than workers, as seen in a slightly lower peak in the distribution of facing positions (Fig. 7C). Workers faced the flower mostly when they were close to it, but males faced the flower over a broader range of distances (Fig. 7D).

## **Discussion**

Our results show that male and female bumblebees perform flights when leaving flowers that have a similar structure in the two sexes suggesting that males, like workers, perform learning flights when leaving flowers. Although some males, like workers, returned to the flower after their learning flight, we do not know what males have memorised about the flower and its location during the flight. Male bumblebees have recently been found to learn the colours of artificial flowers and approach the rewarded colour while avoiding unrewarded colours (Wolf and Chittka, 2016), but it is unknown whether colour was memorised during a learning flight. The essence of this flight is that it contains periods of directed looking that are presumably coupled to the activation of learning. Thus, the males' and females' patterns of fixation of a flower during learning flights (Fig. 5) suggest that both sexes learn something about it; a conclusion that is reinforced by both males and workers facing the flower during their returns (Fig. 7).

Bumblebee workers forage on a diversity of flowers in different locations, and it may be that learning the colour, shape and odour of a good species is just as or even more important than knowing a flower's exact location within a patch (Heinrich, 1979), though bumblebees can be



faithful to the location of a patch, even when the flower species in the patch changes (Ogilvie and Thomson, 2016), indicating some locational learning of flowers. Honeybees can learn the details of a flower's appearance on both arrival and departure (Lehrer, 1993), but they seem to learn location in terms of a flower's proximity to other objects only on departure flights (Lehrer and Collett, 1994). It is unknown whether bumblebees are similar in this respect and whether males differ from females in their learning capacities.

Learning flights can be elicited by several factors such as drinking nectar or leaving a nest. They are also modulated by a variety of factors, like drinking time and sucrose concentration, enclosure in a hive or nest for protracted periods, and difficulty in finding a goal (e.g. Wagner, 1907; Wei et al., 2002; Wei and Dyer, 2009). The duration of a learning flight seems to be correlated with the significance of the place that the bee leaves. Thus, workers leaving their nest perform much longer flights than when they leave a flower (Fig. 4). It is still unclear whether bees learn the same things when viewing flowers or the surroundings of the nest entrance.

Males of different bee species have a variety of mating strategies (Goulson, 2010; Paxton, 2005). In bumblebees the commonest is that of *B. terrestris* which patrols areas along routes. Other species are territorial and wait, hovering or perched, near a prominent visual object to pounce upon potential passing mates. Might males learn their visually specified hovering positions, as do patrolling halictine bees (Barrows, 1976)? Honeybee drones are quite different from bumblebees. They make excursions from their nest to drone aggregation sites to find and mate with queens (Galindo-Cardona et al., 2015; Loper et al., 1992; Witherell, 1971). When unsuccessful they return to the nest for feeding, as also do some male carpenter bees (Leys, 2000; Wittmann and Scholz, 1989). Does the occurrence of learning flights of honeybee and carpenter bee males also fit with their life style: learning flights when leaving the hive (to which they return for sustenance), instead of at flowers (which they don't visit)?

## **Acknowledgments**

We thank Andrew Philippides for providing Matlab scripts, Ka Yee Chow for help with experiments and Matthew Collett for discussion.

## **Competing interests**

No competing interests declared

## **Author contributions**

T. R. initially observed male flights from a flower. All authors contributed to the design of the research; T.R. and E. F. collected data; T. R. analyzed the data; T.R., T.S.C. and N.H. designed the analysis and wrote the paper, with inputs from E.F.

## **Funding**

Financial support came from the Leverhulme Trust (RPG-2012-677).

## References

- Baer, B.** (2003). Bumblebees as model organisms to study male sexual selection in social insects. *Behav. Ecol. Sociobiol.* **54**, 521-533.
- Barrows, E. M.** (1976). Mating behavior in halictine bees (Hymenoptera: Halictidae): I, patrolling and age-specific behavior in males. *J. Kansas Entomol. Soc.* **49**, 105-119.
- Brünnert, U., Kelber, A. and Zeil, J.** (1994). Ground-nesting bees determine the location of their nest relative to a landmark by other than angular size cues. *J. Comp. Physiol. A* **175**, 363-369.
- Collett, T.** (1995). Making learning easy: the acquisition of visual information during the orientation flights of social wasps. *J. Comp. Physiol. A* **177**, 737-747.
- Collett, T. S., Hempel de Ibarra, N., Riabinina, O. and Philippides, A.** (2013). Coordinating compass-based and nest-based flight directions during bumblebee learning and return flights. *J. Exp. Biol.* **216**, 1105-1113.
- Collett, T. S. and Lehrer, M.** (1993). Looking and learning: A spatial pattern in the orientation flight of the wasp *Vespa vulgaris*. *Proc. Roy. Soc. B* **252**, 129-134.
- Coppée, A., Mathy, T., Cammaerts, M.-C., Verheggen, F. J., Terzo, M., Iserbyt, S., Valterová, I. and Rasmont, P.** (2011). Age-dependent attractiveness of males' sexual pheromones in *Bombus terrestris* (L.) [Hymenoptera, Apidae]. *Chemoecol.* **21**, 75-82.
- Galindo-Cardona, A., Monmany, A. C., Diaz, G. and Giray, T.** (2015). A landscape analysis to understand orientation of honey bee (Hymenoptera: Apidae) drones in Puerto Rico. *Environ. Entomol.* **44**, 1139-1148.
- Gerloff, C. U. and Schmid-Hempel, P.** (2005). Inbreeding depression and family variation in a social insect, *Bombus terrestris* (Hymenoptera: Apidae). *Oikos* **111**, 67-80.
- Good, P. I.** (2006). *Resampling Methods: A Practical Guide to Data Analysis*. Basel: Birkhäuser
- Goulson, D.** (2010). *Bumblebees: their behaviour and ecology*: Oxford University Press.
- Heinrich, B.** (1979). *Bumblebee economics*. Cambridge: Harvard University Press.
- Hempel de Ibarra, N., Philippides, A., Riabinina, O. and Collett, T. S.** (2009). Preferred viewing directions of bumblebees (*Bombus terrestris* L.) when learning and approaching their nest site. *J. Exp. Biol.* **212**, 3193-3204.
- Howell, D. E. and Usinger, R. L.** (1933). Observations on the flight and length of life of drone bees. *Ann. Entomol. Soc. Am.* **26**, 239-246.
- Kraus, F. B., Wolf, S. and Moritz, R. F. A.** (2009). Male flight distance and population substructure in the bumblebee *Bombus terrestris*. *J. Anim. Ecol.* **78**, 247-252.
- Lehrer, M.** (1993). Why do bees turn back and look? *J. Comp. Physiol. A* **172**, 549-563.
- Lehrer, M. and Collett, T. S.** (1994). Approaching and departing bees learn different cues to the distance of a landmark. *J. Comp. Physiol. A* **175**, 171-177.
- Leys, R.** (2000). Mate locating strategies of the green carpenter bees *Xylocopa (Lestis) aeratus* and *X.(L.) bombylans*. *J. Zool.* **252**, 453-462.
- Loper, G. M., Wolf, W. W. and Taylor, O. R.** (1992). Honey bee drone flyways and congregation areas: radar observations. *J. Kansas Entomol. Soc.* **65**, 223-230.
- Ogilvie, J. E. and Thomson, J. D.** (2016). Site fidelity by bees drives pollination facilitation in sequentially blooming plant species. *Ecology* **97**, 1442-1451.
- Opfinger, E.** (1931). Über die Orientierung der Biene an der Futterquelle - Die Bedeutung von Anflug und Orientierungsflug für den Lernvorgang bei Farb-, Form- und Ortsdressuren. *Z. Vergl. Physiol.* **15**, 431-487.
- Paxton, R. J.** (2005). Male mating behaviour and mating systems of bees: an overview. *Apidol.* **36**, 145-156.
- Philippides, A., Hempel de Ibarra, N., Riabinina, O. and Collett, T. S.** (2013). Bumblebee calligraphy: the design and control of flight motifs in the learning and return flights of *Bombus terrestris*. *J. Exp. Biol.* **216**, 1093-104.

- Riabinina, O., Hempel de Ibarra, N., Philippides, A. and Collett, T. S.** (2014). Head movements and the optic flow generated during the learning flights of bumblebees. *J. Exp. Biol.* **217**, 2633-2642.
- Stürzl, W., Zeil, J., Boeddeker, N. and Hemmi, J. M.** (2016). How wasps acquire and use views for homing. *Curr. Biol.* **26**, 470-82.
- Tinbergen, N.** (1932). Über die Orientierung des Bienenwolfes (*Philanthus triangulum* Fabr.). *Zeitschrift für Vergleichende Physiologie* **16**, 305-334.
- Vollbehrl, J.** (1975). Zur Orientierung junger Honigbienen bei ihrem ersten Orientierungsflug. *Zool. Jb. Physiol.* **79**, 33-69.
- Wagner, W.** (1907). Psychobiologische Untersuchungen an Hummeln. *Zoologica* **19**, 1-239.
- Wei, C., Rafalko, S. and Dyer, F.** (2002). Deciding to learn: modulation of learning flights in honeybees, *Apis mellifera*. *J. Comp. Physiol. A* **188**, 725-737.
- Wei, C. A. and Dyer, F. C.** (2009). Investing in learning: why do honeybees, *Apis mellifera*, vary the durations of learning flights? *Anim. Behav.* **77**, 1165-1177.
- Whitehorn, P. R., Tinsley, M. C., Brown, M. J., Darvill, B. and Goulson, D.** (2009). Impacts of inbreeding on bumblebee colony fitness under field conditions. *BMC Evol. Biol.* **9:152**.
- Witherell, P. C.** (1971). Duration of flight and of interflight time of drone honey bees, *Apis mellifera*. *Ann. Entomol. Soc. Am.* **64**, 609-612.
- Wittmann, D. and Scholz, E.** (1989). Nectar dehydration by male carpenter bees as preparation for mating flights. *Behav. Ecol. Sociobiol.* **25**, 387-391.
- Wolf, S. and Chittka, L.** (2016). Male bumblebees, *Bombus terrestris*, perform equally well as workers in a serial colour-learning task. *Anim. Behav.* **111**, 147-155.
- Zeil, J.** (1993a). Orientation flights of solitary wasps (*Cerceris sphecidiae*, Hymenoptera) I. Description of flight. *J. Comp. Physiol. A* **172**, 189-205.
- Zeil, J.** (1993b). Orientation flights of solitary wasps (*Cerceris, sphecidiae*, Hymenoptera) II. Similarities between orientation and return flights and the use of motion parallax. *J. Comp. Physiol. A* **172**, 207-222.

## Figures

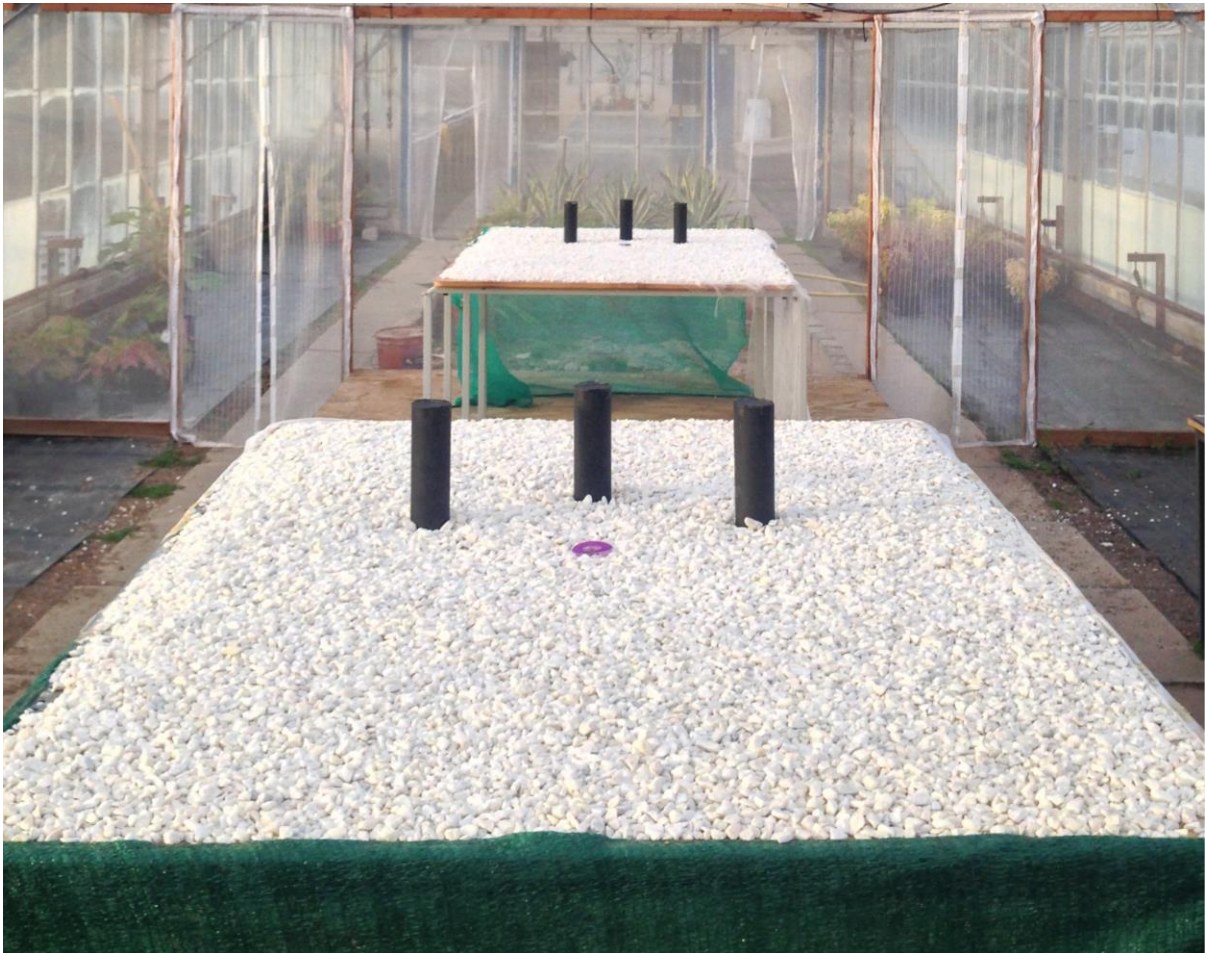

**Figure1. Experimental set up in greenhouse: nest and flower tables**

The nest table is in the foreground with the nest fixed under the table and its exit through a hole near the array of three cylinders. The flower table is in the background with the artificial flower in the same position relative to the cylinders as is the nest hole.

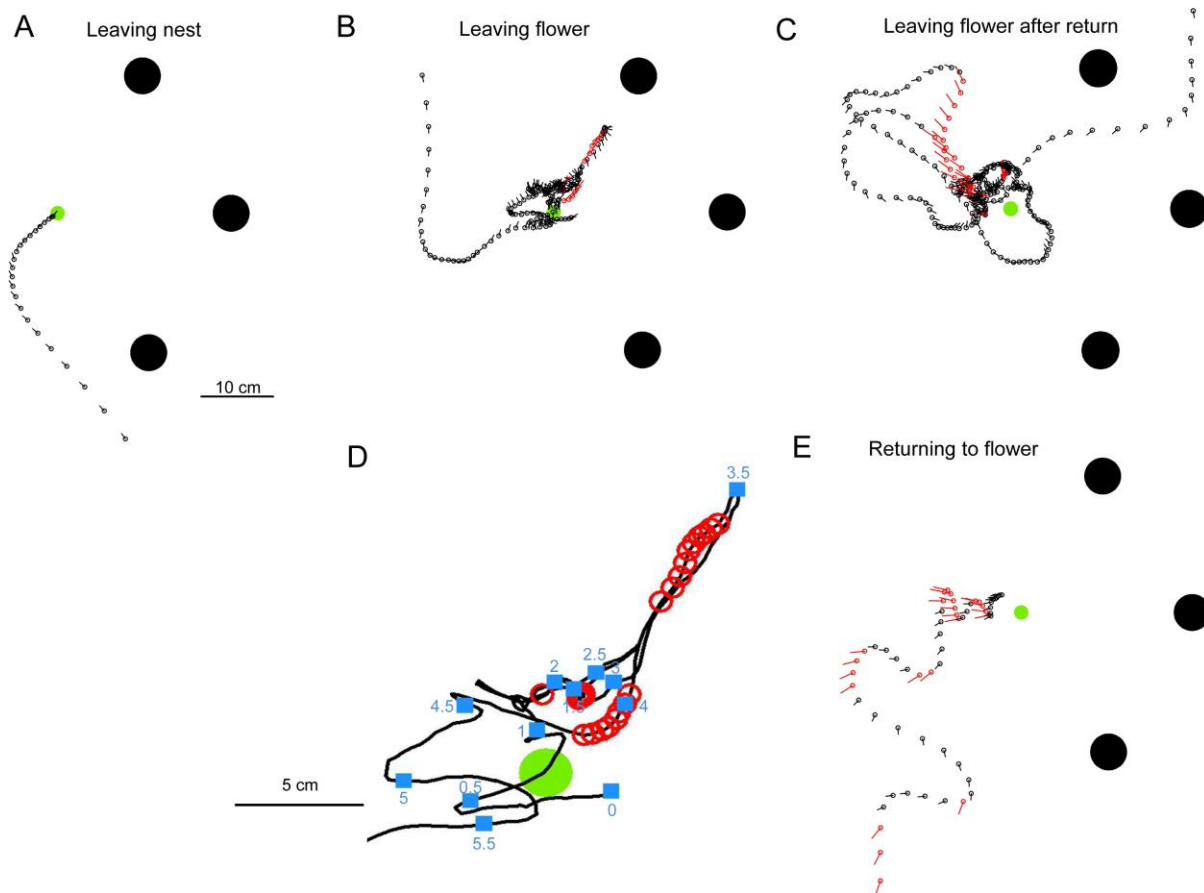

**Figure 2. Example trajectories of male bumblebees**

(A) Departure from nest. (B) Departure from flower. Flights in A and B are by the same male. (C) Departure from a flower by another bee after its spontaneous return to the flower. (D) Enlarged view of the initial segment of the flight in panel B. Red circles indicate fixations of the flower (see text). Blue squares mark the time from the start every 0.5s. (E) Return to flower. In all panels except D, each dot shows the position of the bee every 0.04s and each line the orientation of the bee's body. Red circles and lines indicate instances in which the bee faces the flower. Positions of nest and flower are shown by a green circle. See also Figures S1 and S2.



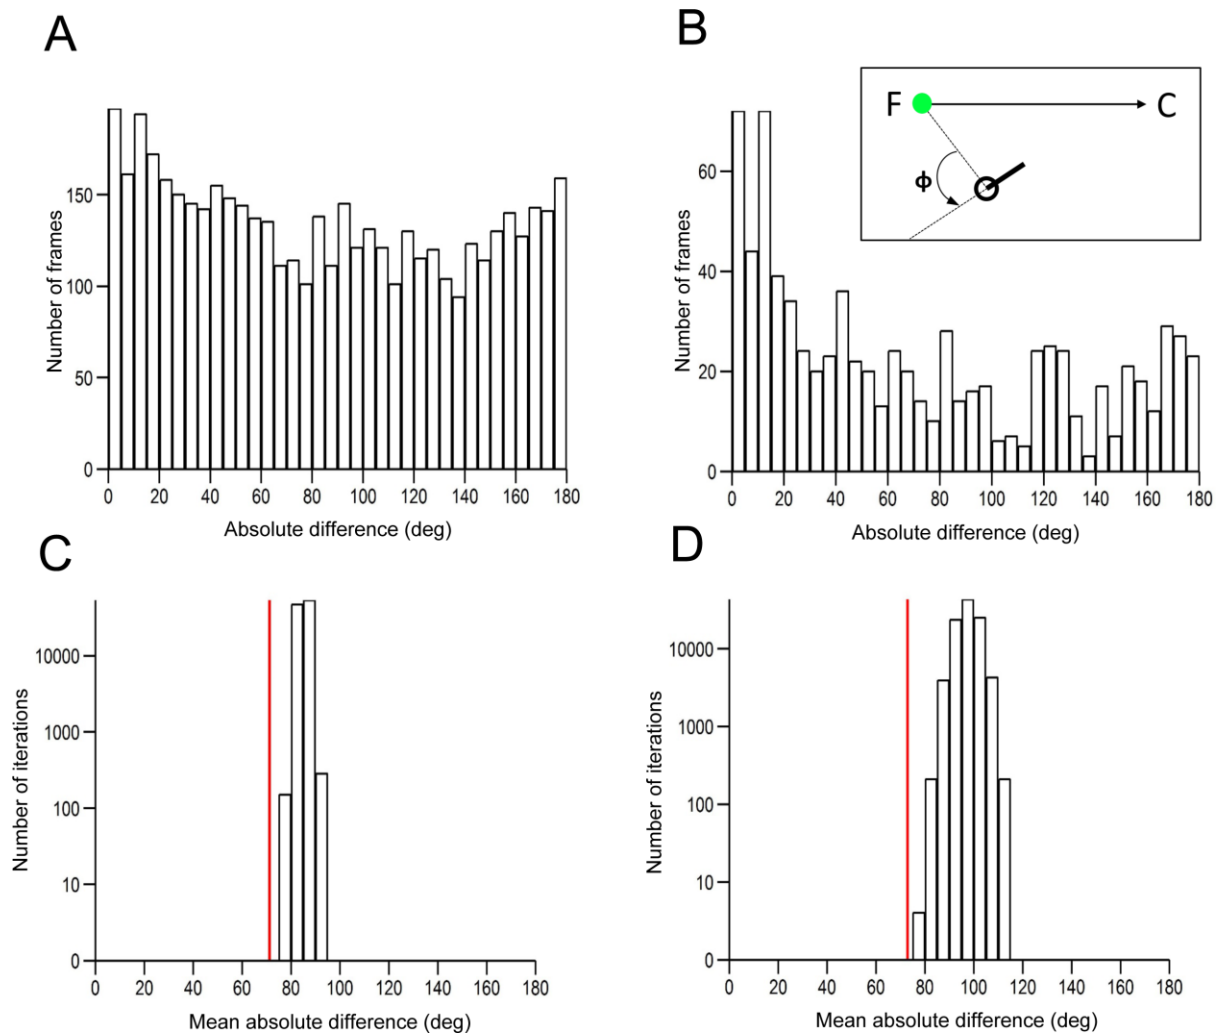

**Fig. 3 Analysis of flower fixations in male learning flights**

(A,B) Distributions of the absolute values of angles between the males' body orientation and the line from bee to flower ( $|\phi|$ ) for every frame in every flight (4872 frames,  $N=24$  males,  $n=24$  flights; A) and for every frame in every fixation (821 frames; B). (C,D) Distributions of the mean  $|\phi|$  of each randomly picked sample of individual frames in C and groups of frames in D. In both cases, 100,000 random samples were randomly selected. The red lines show the measured means of body angle orientation. Their position outside the means of the randomly selected frames and group of frames demonstrate that the measured distribution of body orientations in fixations is not a random selection from the overall distribution of body orientations during learning flights of male bumblebees. Inset shows the angle ' $\phi$ ' between the flower and the bee's longitudinal body axis.



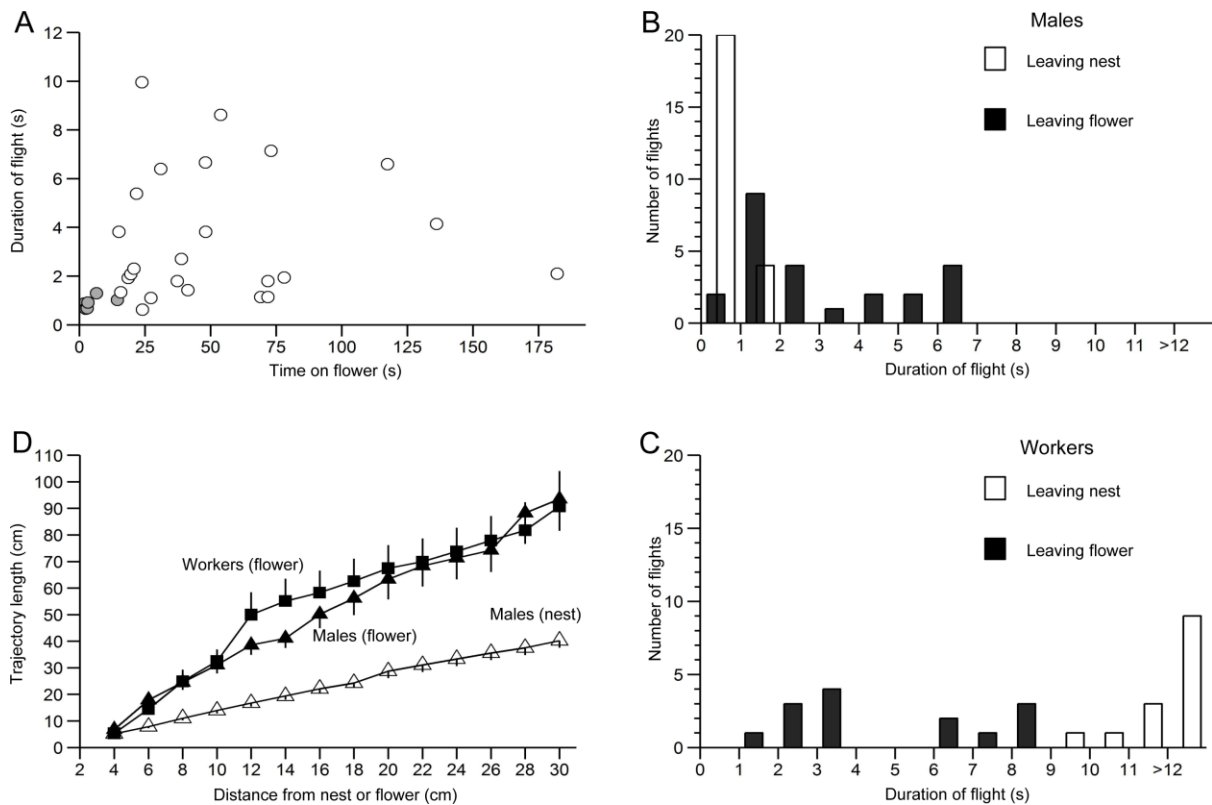

**Figure 4. Some properties of male and female learning flights**

(A) Duration of male departure flights from the flower (i.e. time taken to cross a 30 cm radius circle around the flower) is plotted against time spent drinking on the flower before departure (N=30 males). Filled circles depict males with short drinking time (bottom quartile) that were excluded from further analysis (N=6 males). (B) Durations of male departure flights from nest and flower. (C) Durations of worker departure flights from nest and flower. The flights of males from the flower were a little shorter (N=24 males, n=24 flights, Mean=3.58s±0.54SE) than those of workers (N=14 workers, n=14 flights, Mean=4.94s±0.72SE) (Mann-Whitney-U, U=109, Z=-1.79, p=0.07). Worker flights from the nest lasted longer than the other three categories (Mean=14.42s±1.20SE). (D) Cumulative trajectory lengths flown by males leaving the nest or flower and by workers leaving the flower. Lengths at different distances from the flower or nest are those measured before the bee first crosses a circle of a given radius to a maximum of 30 cm. The mean total trajectory length of males leaving the nest was 40.25cm±2.74SE) and of males leaving the flower was 98.53cm (±12.05SE; Wilcoxon, W=21, Z=-3.69, p= 0.0002). The mean trajectory length of workers leaving the flower was 90.75 cm (±13.25SE). It was slightly but not significantly shorter than the trajectories of males leaving the flower (Mann-Whitney-U, U=159, Z=-0.27, p=0.79). See also Figures S1 and S2.

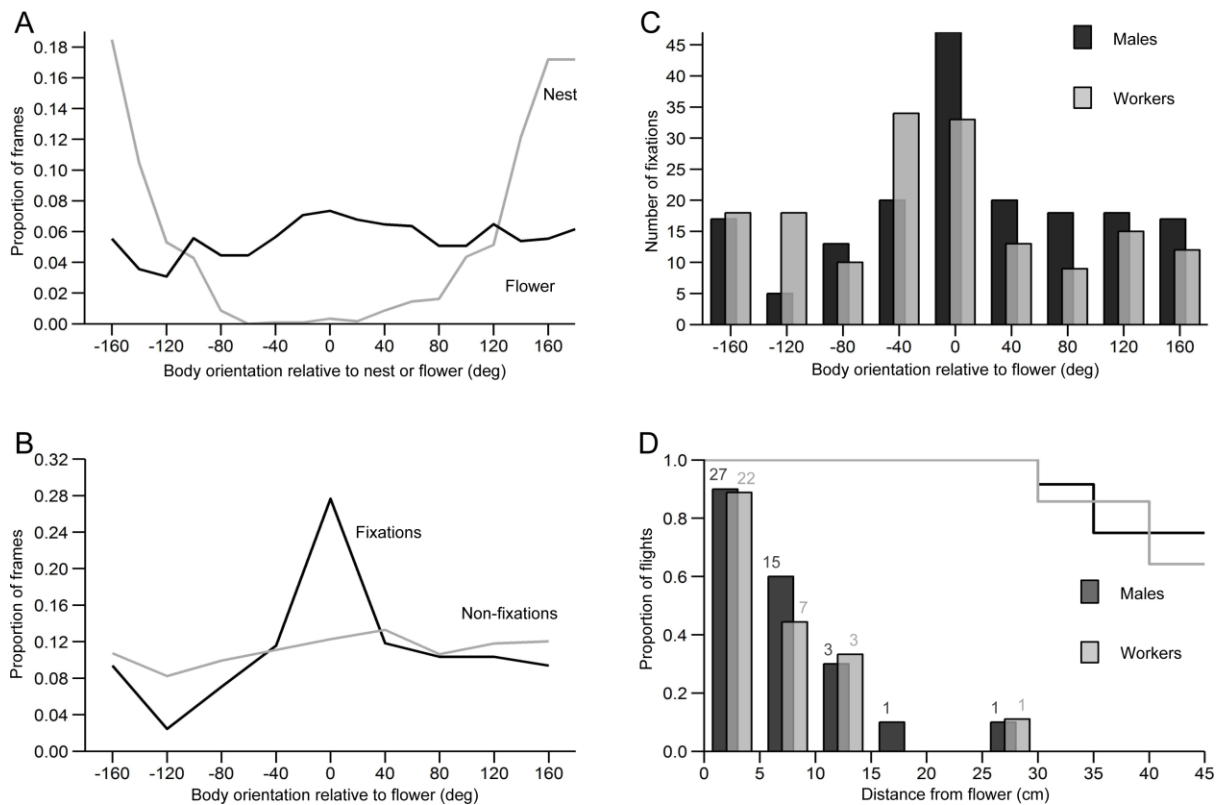

**Figure 5. Fixations of flower and nest during learning flights**

(A) Frequency distributions of males' body orientation relative to the goal when leaving nest (black line, 1169 frames) or flower (grey line, 4872 frames;  $N=24$  males). Bin width is  $20^\circ$ . (B) Distributions of body orientation relative to flower when all frames of male departure flights are partitioned into frames within fixations (821 frames) and frames outside fixations (4051 frames). (C) Frequency distributions of male and worker fixations (175 male, 162 worker fixations;  $N=24$  males,  $N=14$  workers) relative to the flower ( $40^\circ$  bin width). (D) Proportion of flights which have at least one flower fixation ( $\phi = 0^\circ \pm 20^\circ$ ) within a specified distance from the flower ( $N=10$  males,  $N=9$  workers). The numbers above each 5cm bin give the total number of fixations falling in that bin. The lines above the histograms show the proportion of flights at each distance that are at least as long as that distance ( $N=24$  males,  $N=14$  workers).

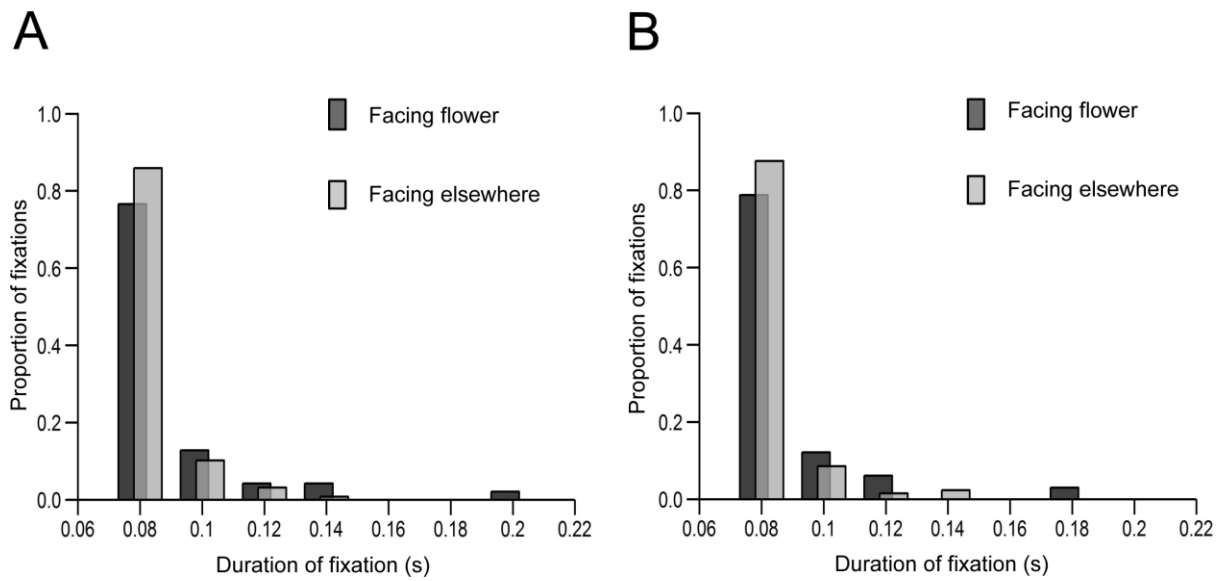

**Figure 6. Durations of the fixations in male and female learning flights**

Normalised distributions of the duration of all fixations in (A) males ( $n=175$  fixations;  $N=24$  males) and (B) workers ( $n=162$  fixations;  $N=14$  workers). Male and female fixations are partitioned into those in which bees faced ( $\varphi=0^\circ\pm 20^\circ$ ), males ( $n_f=47$  fixations), workers ( $n_f=33$  fixations); or did not face the flower ( $\varphi < -20^\circ$  or  $\varphi > 20^\circ$ ).

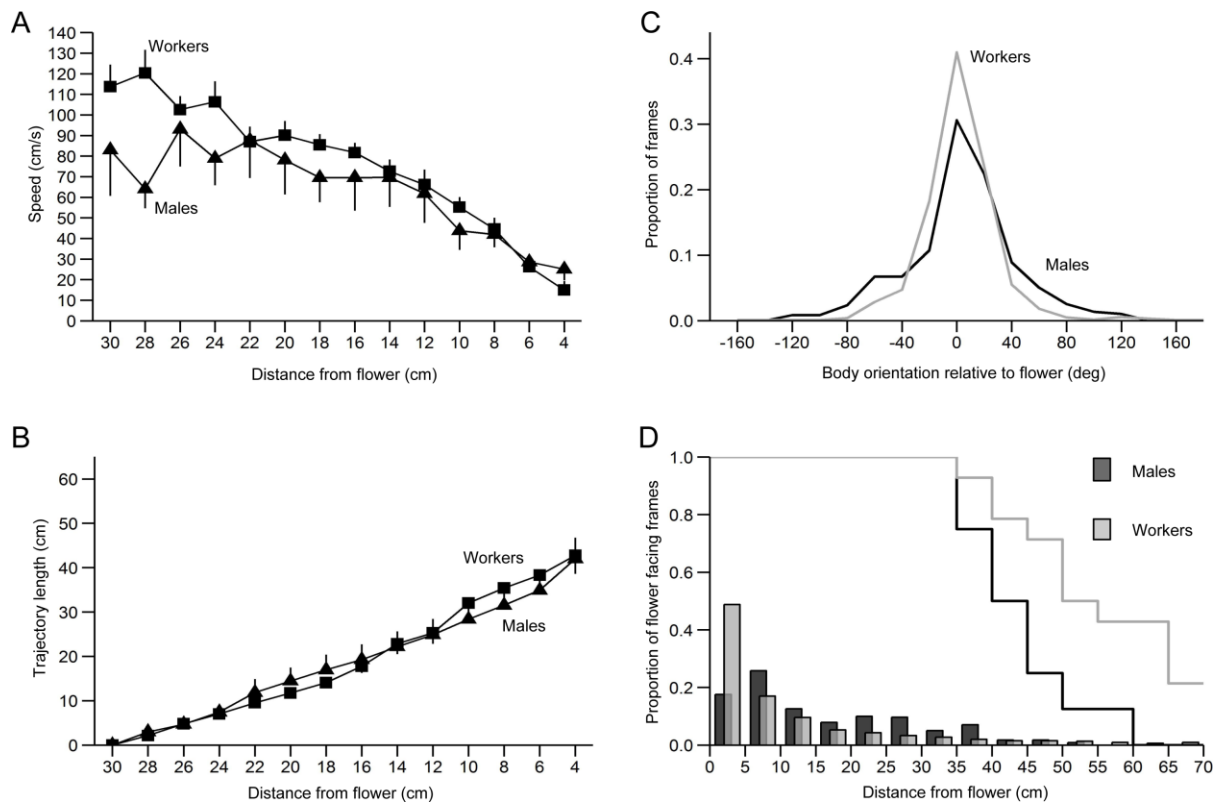

**Figure 7. Comparisons of male and worker returns to flower**

(A) Flight speed plotted against distance from flower (N=8 males, N=14 workers). (B) Cumulative trajectory length as a function of distance from flower. (C) Frequency distributions of body orientation relative to flower (males N=595 frames, workers N=1255). (D) Relative frequency of flower facing ( $\varphi = 0^\circ \pm 20^\circ$ ) plotted against distance from flower (males, N= 341 frames, workers N=811 frames). The lines above the histograms show the proportion of flights at each distance that are as least as long as that distance (N=8 males, N=14 workers).

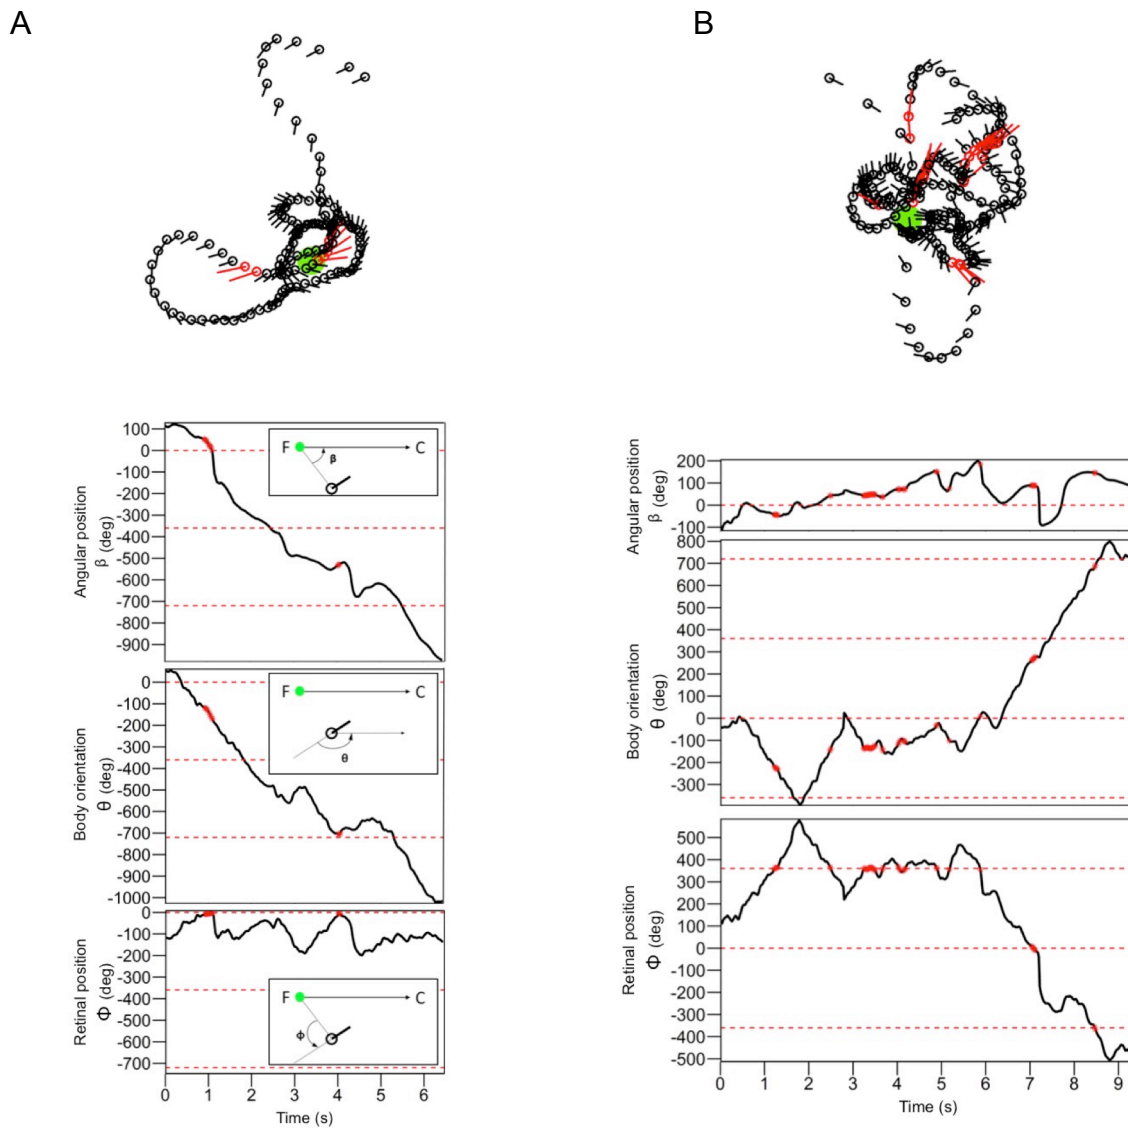

**Figure S1. Further example trajectories of a bumblebee male (A) and worker (B) leaving the flower.**

In some learning flights bees turn for long periods in the same direction, rotating clock- or counter-clockwise through several complete revolutions. In other flights bees alternate their direction of rotation. Each dot depicts the position of the bee every 40 ms. The line shows the bee's body orientation. Red circles and lines indicate when the bee faces the flower. Green circle shows the position of the flower. Time plots show the bee's cumulative angular position ( $\beta$ ), its body orientation ( $\theta$ ) relative to the line between the flower and central landmark (F-C), and the position of the flower relative to the bee's longitudinal axis ( $\phi$ , 'Retinal' position for short). Arrows (inset) point in a positive direction. Moments in which the bee faced the flower ( $\pm 10^\circ$ ) are shown in red.

A

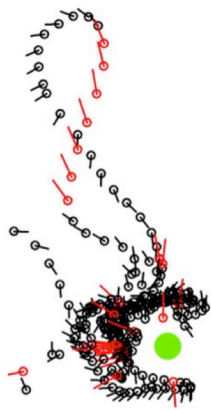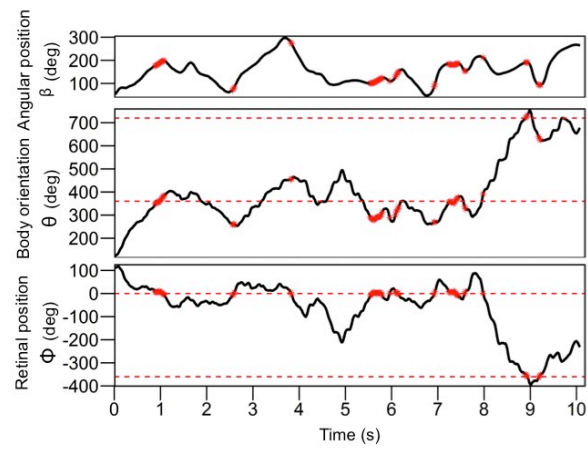

B

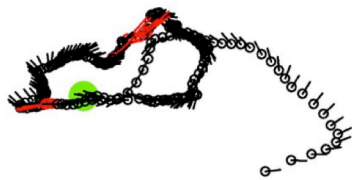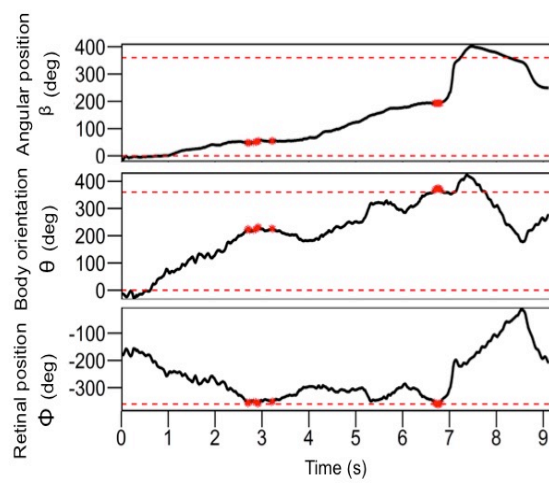

**Figure S2. Further similarities in the learning flights of a bumblebee male (A) and worker (B) leaving the flower.** For details see Figure S1.
